# Supplementary material for: CRISPR-engineered mosaicism rapidly reveals that loss of Kcnj13 function in mice mimics human disease phenotypes
Source: PubMed Central journal article supplement (PMC4322368; doi:10.1038/srep08366), 2015-02-10
Supplement: srep08366-s1.pdf [file srep08366-s1.pdf]

## Supplementary Information

### **CRISPR-engineered mosaicism rapidly reveals that loss of *Kcnj13* function in mice mimics human disease phenotypes**

Hua Zhong<sup>1</sup>, Yiyun Chen<sup>2,3</sup>, Yumei Li<sup>2,3</sup>, Rui Chen<sup>2,3,4</sup>, and Graeme Mardon<sup>1,3,4,5,6</sup>

<sup>1</sup>Department of Pathology and Immunology, Baylor College of Medicine, Houston, TX 77030,

<sup>2</sup>HGSC, Baylor College of Medicine, Houston, TX 77030, <sup>3</sup>Department of Molecular and

Human Genetics, Baylor College of Medicine, Houston, TX 77030, <sup>4</sup>Program in Developmental

Biology, Baylor College of Medicine, Houston, TX 77030, <sup>5</sup>Department of Neuroscience,

Baylor College of Medicine, Houston, TX 77030, <sup>6</sup>Department of Ophthalmology, Baylor

College of Medicine, Houston, TX 77030.

Correspondence and requests for materials should be addressed to G.M. (email:

gmardon@bcm.edu)

## Figure Legends

**Supplementary Figure S1.** sgRNA design, zygote injection, and genotyping. **(a)** Schematic of *Kcnj13* gene structure and sgRNA target sequence information. A restriction enzyme site (*BtgZI*) is located at the putative cleavage site of Cas9 nuclease and provides an opportunity to check CRISPR-Cas9 produced mutations by PCR-RFLP analysis. **(b)** sgRNA and *Cas9* mRNA concentrations used for zygote injection and F0 founder mouse production data. **(c)** PCR-RFLP analysis to confirm F0 mutant mice. All F0 mice failed to show complete cleavage by restriction enzyme *BtgZI* compared to a wild-type control, indicating that CRISPR-Cas9 efficiently produced mutations at the selected target site.

**Supplementary Figure S2.** CRISPR-Cas9-mediated KCNJ13 F0 mosaic expression in whole retinal sections and corresponding morphological phenotypes. **(a)** KCNJ13 expression in RPE cells from a 13-week-old F0 wild-type mouse. **(b)** Observed KCNJ13 mosaic expression and rhodopsin mislocalization in F0 mosaic mouse k813110115 at 13 weeks of age following CRISPR-Cas9 zygote injection. **(c)** A representative section showing somewhat reduced KCNJ13 expression in F0 mosaic mouse k713110113 at 22 weeks of age. Little or no photoreceptor cell loss is observed. **(d)** Patchy KCNJ13 expression, loss of photoreceptor cells, and rhodopsin mislocalization observed in F0 mosaic mouse k713110104 at 33 weeks of age. Cell non-autonomous rescue of photoreceptor cells by surrounding KCNJ13-expressing RPE cells is shown in the inset. White arrowheads mark rhodopsin mislocalization.

**Supplementary Figure S3.** No programmed cell death is observed in the RPE cell layer in the absence of *Kcnj13* function. A representative retinal section of mosaic mouse k713110104 is shown. Although we observed rare TUNEL-positive cells in the ONL only in regions showing photoreceptor loss (indicated by DPAI staining), no TUNEL staining was observed in the RPE. The observed TUNEL signals marked by white arrowheads are shown in the insets. RPE, retinal pigment epithelium. ONL, outer nuclear layer. INL, inner nuclear layer.

**Supplementary Figure S4.** Off-target effects are not observed in the top predicted sites using the Surveyor assay. **(a)** We examined the top 6 predicted off-target sites overall (off-target #6, 8-12) and all 7 gene-related off-target sites (off-target #1-7), of which off-target #6 is predicted to be the second most probable off-target site overall. **(b)** Surveyor nuclease cleavages are clearly observed only at the intended *Kcnj13* on-target site and not in any other examined off-target site.

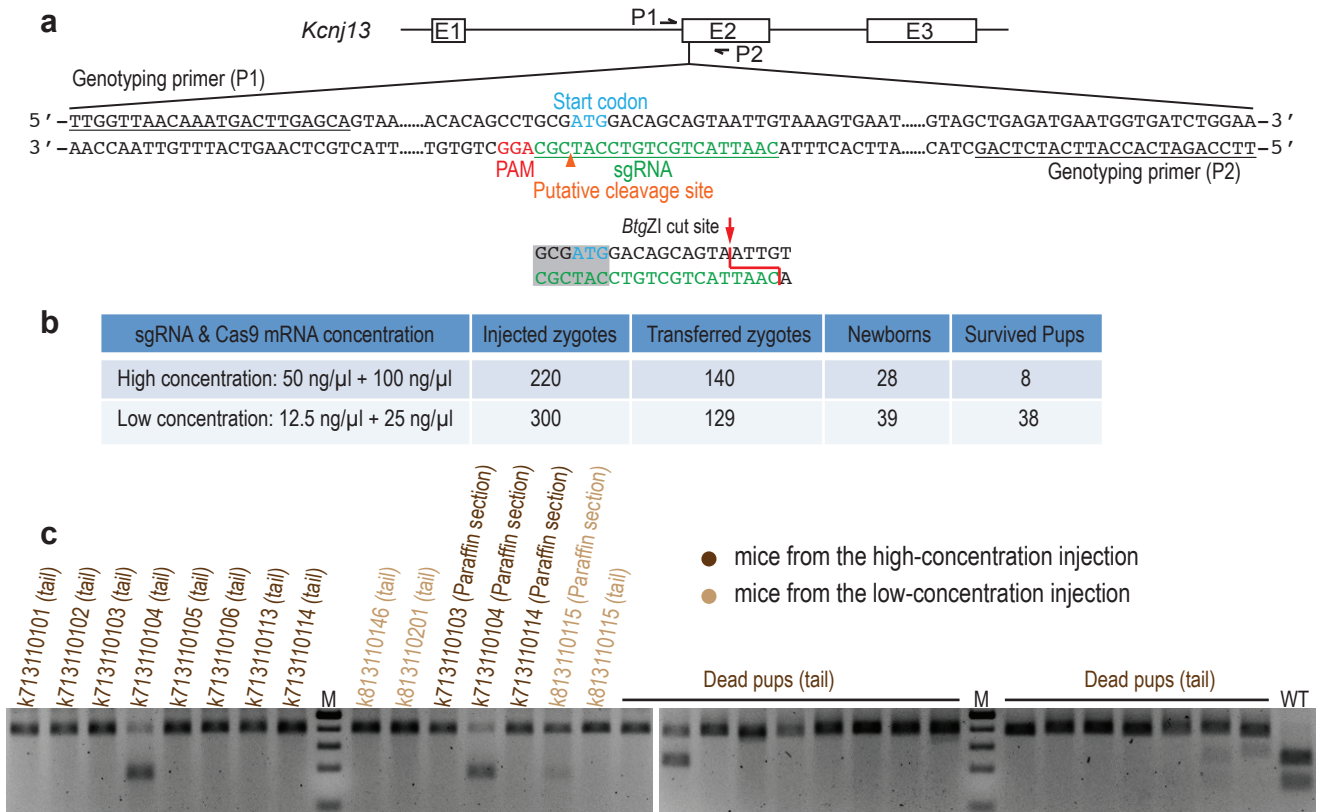

Supplementary Figure S1

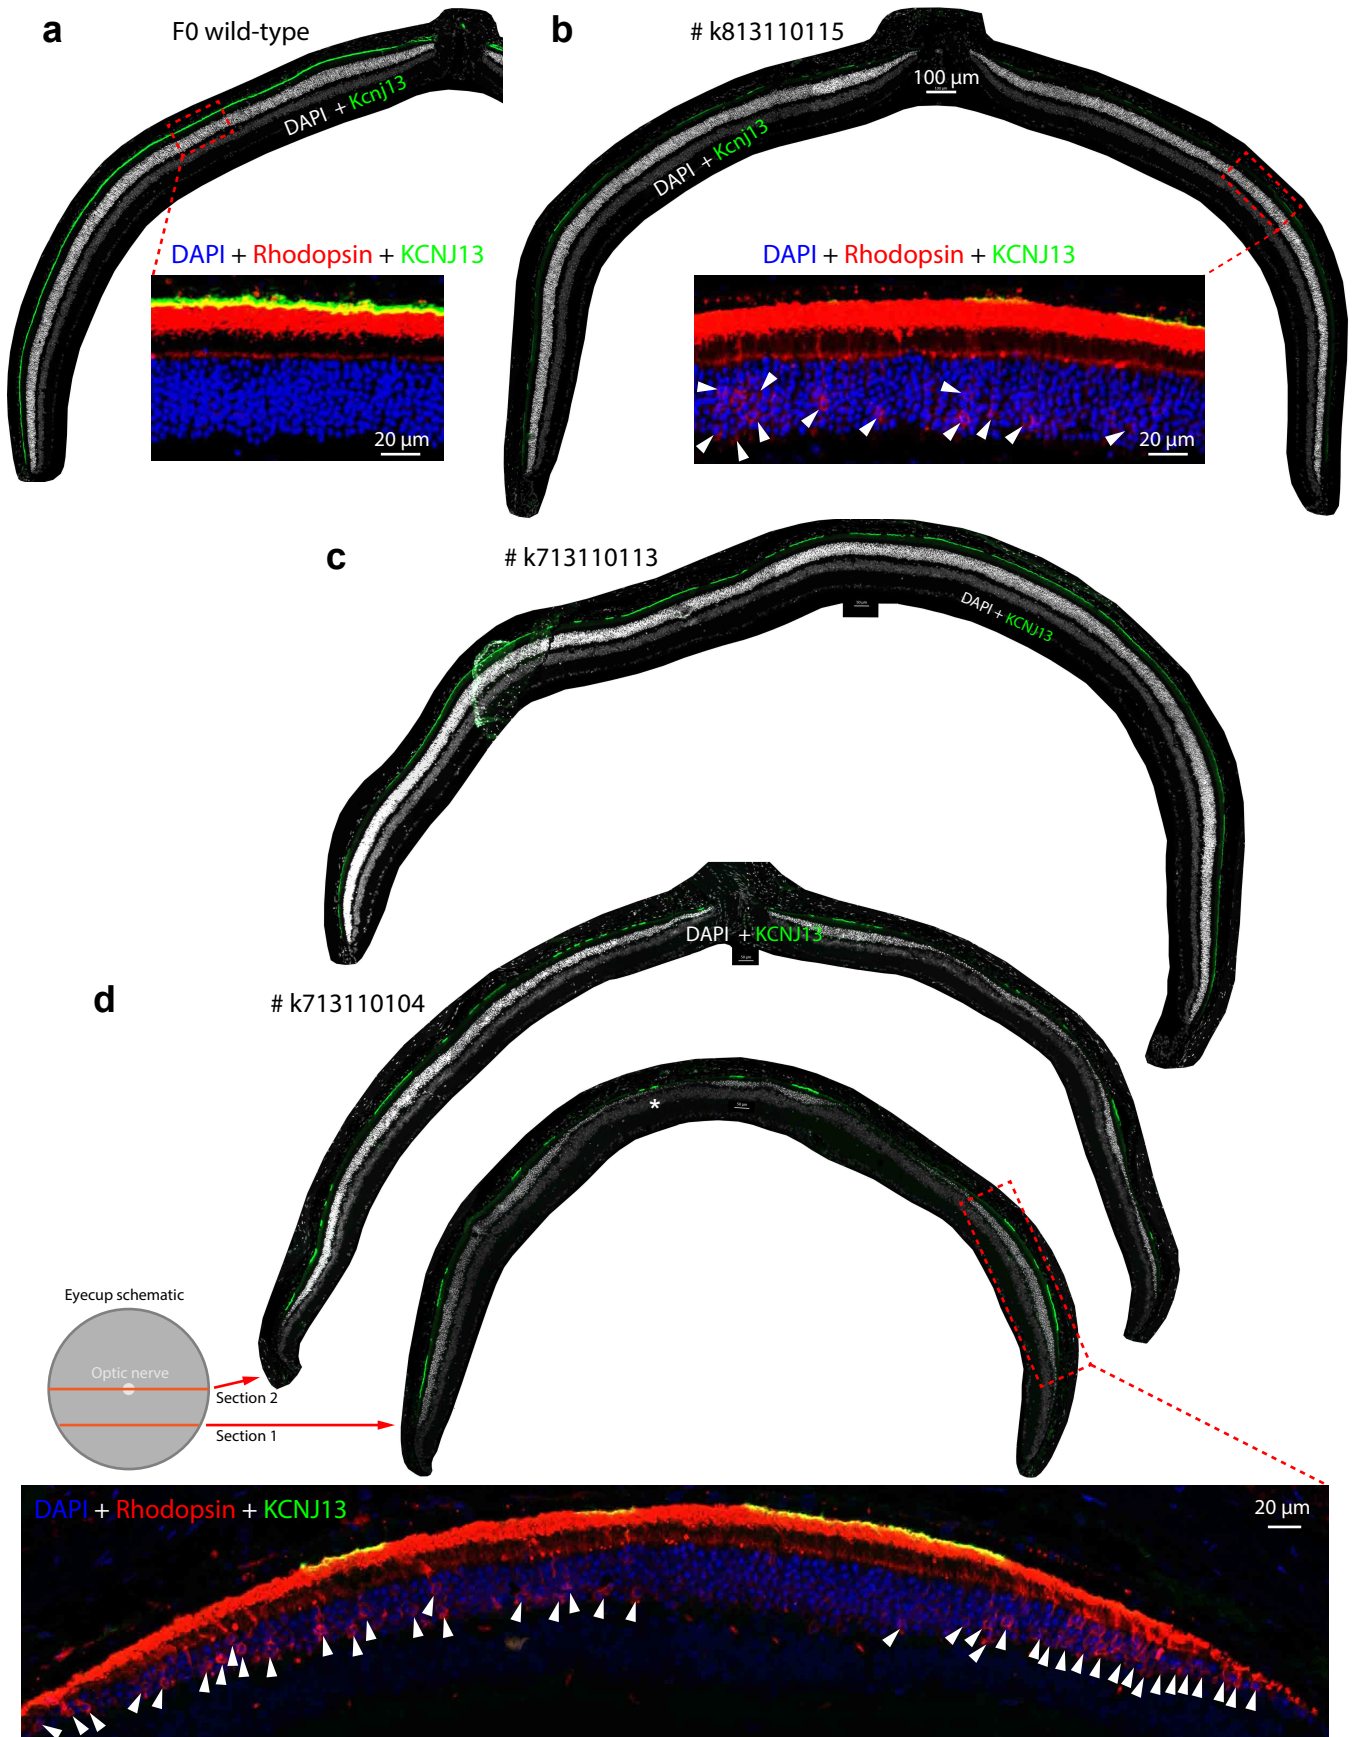

Supplementary Figure S2

# k713110104

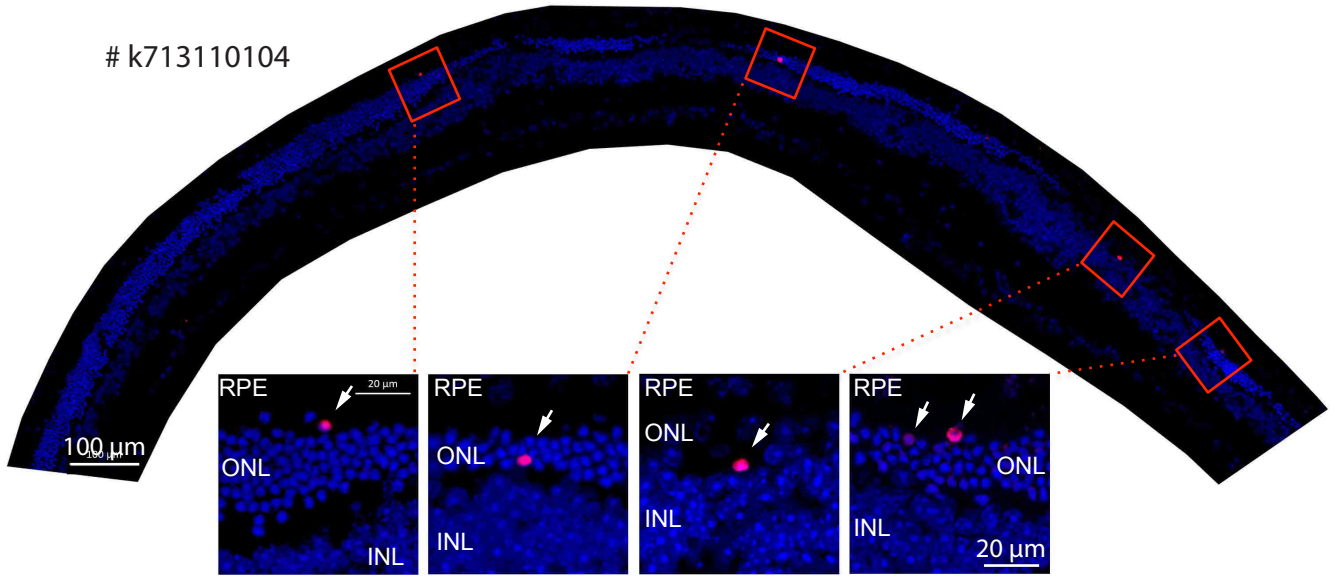

Supplementary Figure S3

**a**

| Target ID      | Sequence                | Score | mismatches        | UCSC gene    | Locus           | Genotyping primers                                |
|----------------|-------------------------|-------|-------------------|--------------|-----------------|---------------------------------------------------|
| On-target      | CAATTACTGCTGTCCATCGCAGG | 87    |                   | NM_001172417 | chr1:-89285947  | TTGGTTAACAAATGACTTGAGCA; TTCCAGATCACCATTTCATCTCAG |
| Off-target #1  | CACCTACTGGAGTCCATTGCAGG | 0.2   | 4MMs [3:10:11:18] | NM_001177600 | chr1:-63575394  | TGAGTTTTCTGCAAAATCTAGGTG; CCATTGGTGGCCCTTCTCT     |
| Off-target #2  | CAAGTGCTGCTTCCATCGAAGG  | 0.2   | 4MMs [4:6:12:20]  | NM_172938    | chr10:-42654763 | CACCTTGGGAGACAGCATCT; GGCGAGACTTCCAGTGTGAT        |
| Off-target #3  | CACCTACTGCTGGCCATCTCAAG | 0.2   | 4MMs [3:4:13:19]  | NM_199299    | chr11:+51634727 | TCCGTGAGAAGGAACCTGAC; GTTTCGGGGTGAATTCCTCAA       |
| Off-target #4  | CAGTTGCTTCTGTCCATCTCTGG | 0.2   | 4MMs [3:6:9:19]   | NM_177780    | chr14:+68402805 | ATTAAGATGTCGGGCAGGAA; GGATCTGGCATCCTCTTGTG        |
| Off-target #5  | CAGTGAGTGTCCATTGCTGG    | 0.2   | 4MMs [3:5:7:18]   | NM_133365    | chr15:+28226833 | TTGTGGCTGGTAATGCTGG; GAGGAGTTGGTGGATGGGTA         |
| Off-target #6  | GAGTTACTGCTGTCCATTGCAAG | 0.7   | 3MMs [1:3:18]     | NM_009185    | chr4:-114681978 | AACCCACTTCCCTAAAAGGAG; TTCTCAGGCTTTACAATACCA      |
| Off-target #7  | CAATCATTGCTGTCTATAGCTGG | 0.1   | 4MMs [5:7:15:18]  | NM_027758    | chr8:+85773229  | ACCGAGAGAGGGAAGGTAC; GGGATTGCGAAAAGCATAAG         |
| Off-target #8  | GAATTCCTGCTGTCCATCTCTGG | 0.7   | 3MMs [1:6:19]     |              | chr2:+14850128  | AAACGTCTGTGCACTGTGT; TGACAGCCCAGAGACTGTTG         |
| Off-target #6  | GAGTTACTGCTGTCCATTGCAAG | 0.7   | 3MMs [1:3:18]     | NM_009185    | chr4:-114681978 |                                                   |
| Off-target #9  | TACTTACTGTTGCCATCGATGG  | 0.6   | 4MMs [1:3:10:20]  |              | chr15:+61625838 | GGCTTGACAGCCATACATGA; AGCCAAGGATCTCAGGAGTG        |
| Off-target #10 | CAGTTACAGCTGTCCATGGCTGG | 0.6   | 3MMs [3:8:18]     |              | chr12:+30046463 | ATGCCGCCAGTAAGATAGA; AGACAAGTGGGGACTTGAA          |
| Off-target #11 | CAAATTCTGCTGTCCATCTCTGG | 0.6   | 3MMs [4:6:19]     |              | chrX:+50469308  | GTCAGCTCACAGGAAAAGG; GGCAGAGTTAGTGACAGCA          |
| Off-target #12 | CAACTCTGCTGTCCATCTCCAG  | 0.6   | 3MMs [4:6:19]     |              | chr11:-34111355 | CTGCCACATGGCTTAGAACA; CTGAGGTGCGAATTGTAGC         |

**b**

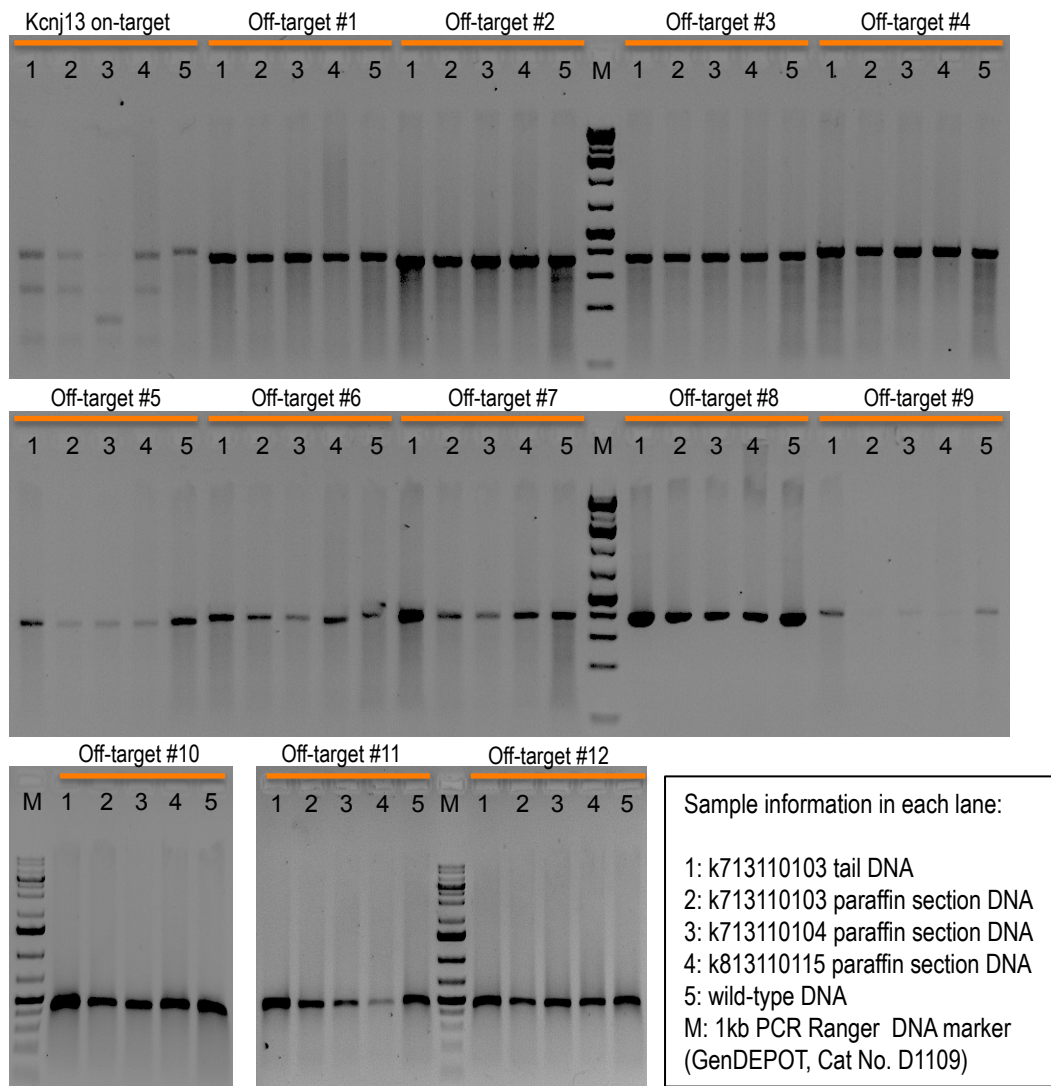

Supplementary Figure S4
